# Supplementary material
Source: MDPI journal article supplement (https://www.mdpi.com/2673-4605/6/1/7)

CMDWC  
2021

# 1st Corrosion and Materials Degradation Web Conference

17-19 MAY 2021 | ONLINE

MDPI  
WEBINARS

## Unveiling the self-healing effect of cerium ions in PMMA-silica coatings on AA7075: A comparative study of Ce(III) and Ce(IV)

Andressa Trentin,  
Samarah V. Harb,  
Mayara C. Uvida,  
Peter Hammer

andressa.trentin@unesp.br  
São Paulo State University – UNESP, Brazil

unesp 

# PMMA-silica-Ce(III)/Ce(IV) coatings

- Hybrid coatings combine properties of polymeric and sol-gel materials
- Aluminum AA7075: widely used in aircrafts
- > 720 days of stability in 3.5% NaCl
- Thickness 5~  $\mu\text{m}$
- Ce(III) vs. Ce(IV): Role of the oxidation state in active corrosion inhibition

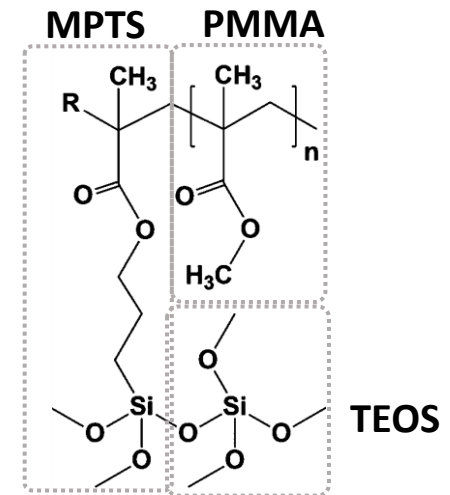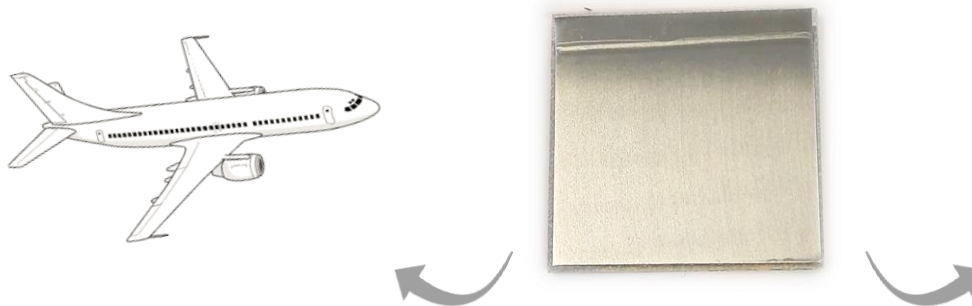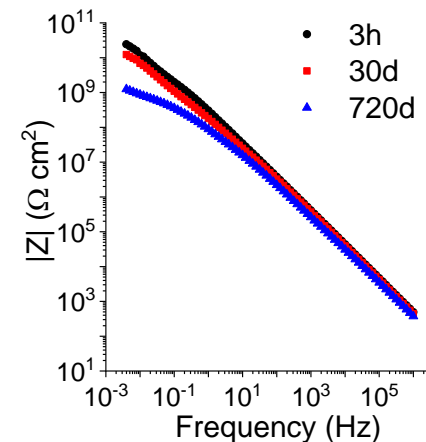

# PMMA-silica-Ce(III)/Ce(IV) synthesis

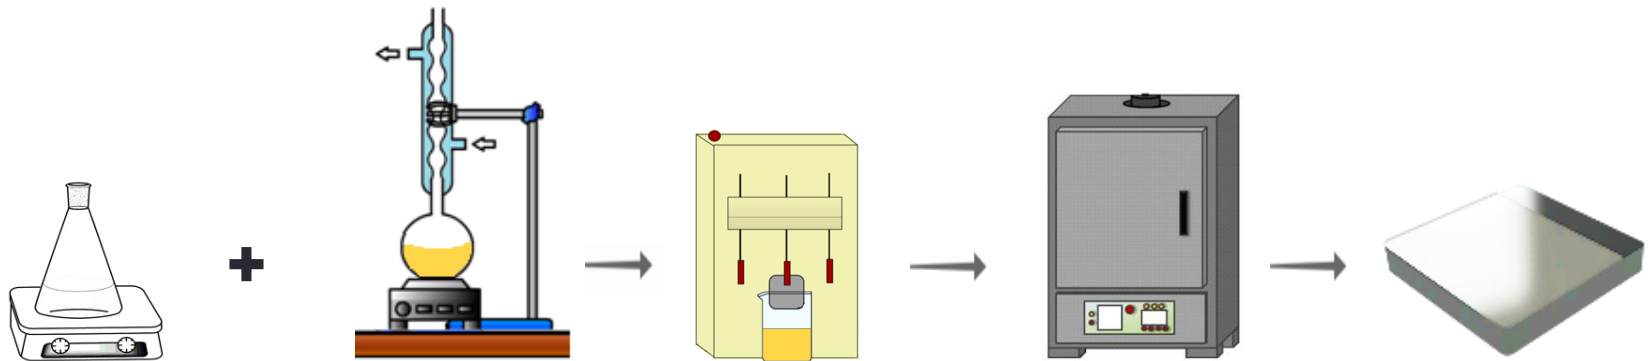

| Sol-gel                                                                                                                                                                                                                                          | Polymerization                                                                                                                        | Dip-coating                                                      | Drying and curing                                                                        | Characterization                                                                                                                                                                                                                                       |
|--------------------------------------------------------------------------------------------------------------------------------------------------------------------------------------------------------------------------------------------------|---------------------------------------------------------------------------------------------------------------------------------------|------------------------------------------------------------------|------------------------------------------------------------------------------------------|--------------------------------------------------------------------------------------------------------------------------------------------------------------------------------------------------------------------------------------------------------|
| <ul style="list-style-type: none"> <li>- TEOS</li> <li>- Ethanol</li> <li>- H<sub>2</sub>O (pH 1)</li> <li>- ((NH<sub>4</sub>)<sub>2</sub>Ce(NO<sub>3</sub>)<sub>6</sub>)</li> <li>- (Ce(NO<sub>3</sub>)<sub>3</sub>·6H<sub>2</sub>O)</li> </ul> | <ul style="list-style-type: none"> <li>- MMA (monomer)</li> <li>- BPO (thermal initiator)</li> <li>- MPTS (coupling agent)</li> </ul> | <ul style="list-style-type: none"> <li>- 3 immersions</li> </ul> | <ul style="list-style-type: none"> <li>- 60 °C / 24 h</li> <li>- 160 °C / 3 h</li> </ul> | <ul style="list-style-type: none"> <li>CeO</li> <li>Ce(III)_05 (500 ppm)</li> <li>Ce(III)_1 (1000 ppm)</li> <li>Ce(III)_3 (3000 ppm)</li> <li>Ce(III)_5 (5000 ppm)</li> <li>Ce(IV)_05</li> <li>Ce(IV)_1</li> <li>Ce(IV)_3</li> <li>Ce(IV)_5</li> </ul> |

# Surface Morphology of PMMA-silica-Ce(III)/Ce(IV) – AFM and SEM

- Roughness in the nm range (0.3 to 6.7 nm)
- Higher Ce(IV) content: Increased  $R_{\text{RMS}}$
- Absence of pores and cracks

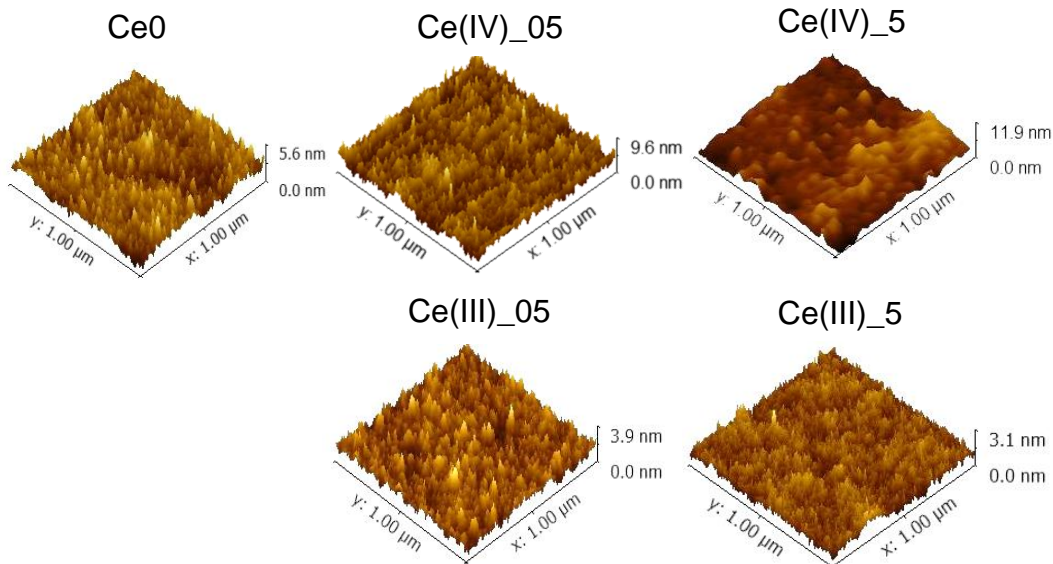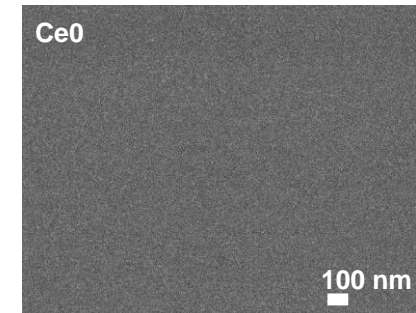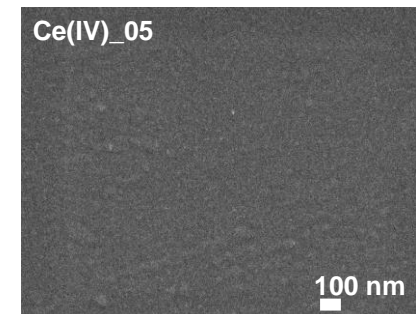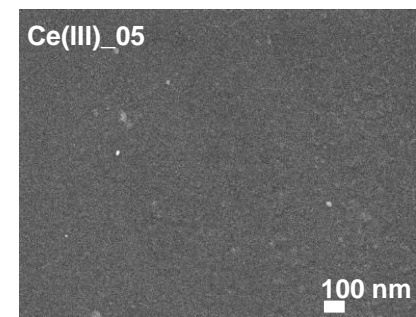

# Electrochemical response over time – EIS

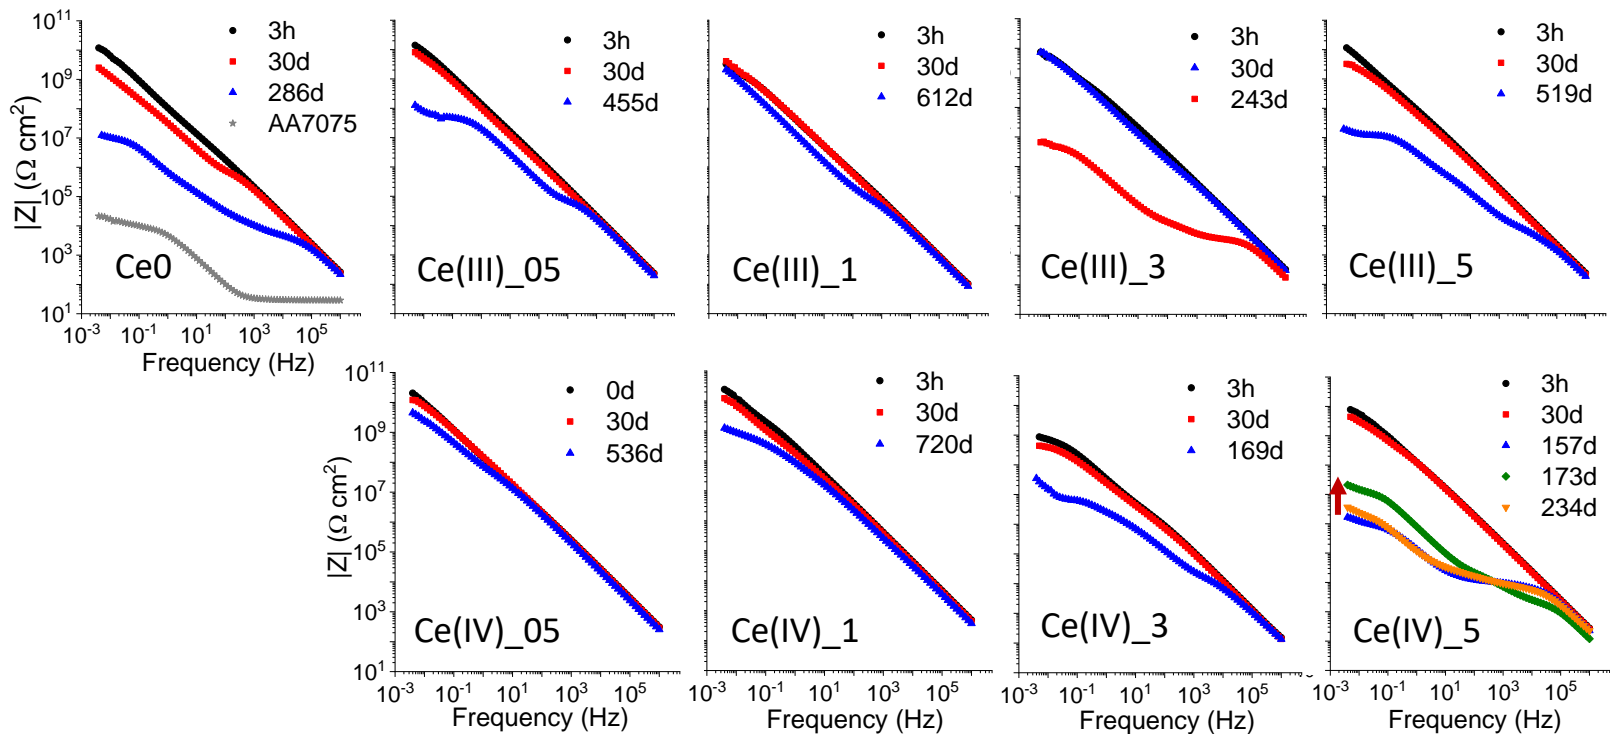

- High low-frequency impedance modulus  $\sim 24 \text{ G}\Omega \text{ cm}^2$  in 3.5% NaCl
- Ce(IV)\_05 and Ce(IV)\_5: *Increased lifespan due to self-healing activity*

# Electrochemical response over time – EIS

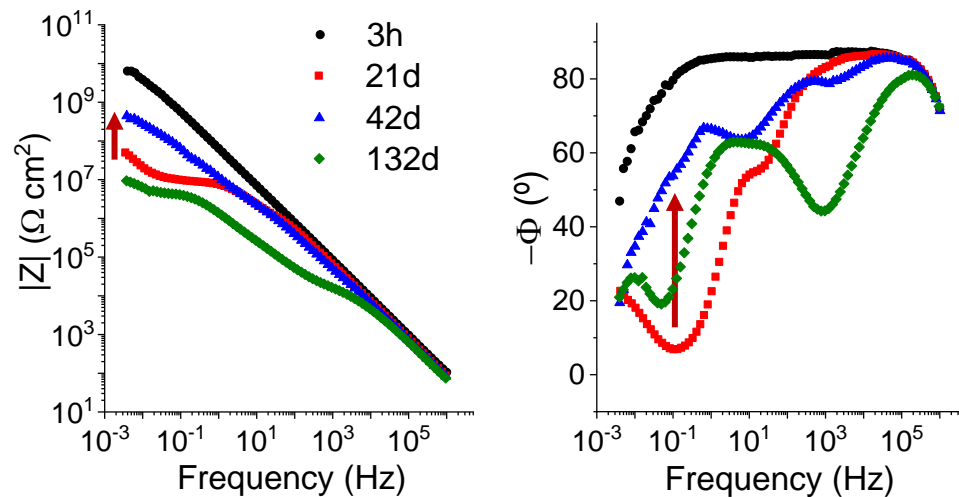

- **Ce(IV)\_05**: Activity on pits of corrosion
- Suppression of the charge transfer process at the interface

# Proposed mechanism – EIS and SIMS

## Ce(IV)\_5

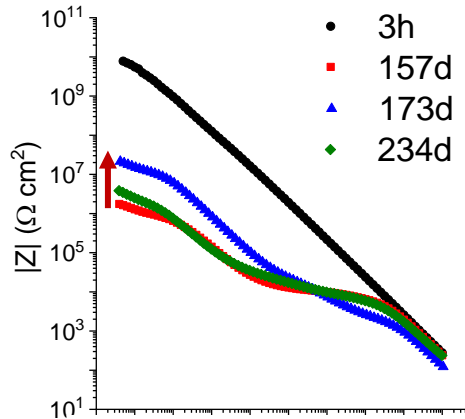

$\text{C}_2\text{H}_3\text{O}_2^+$

$\text{CeO}^+$

$\text{Al}^+$

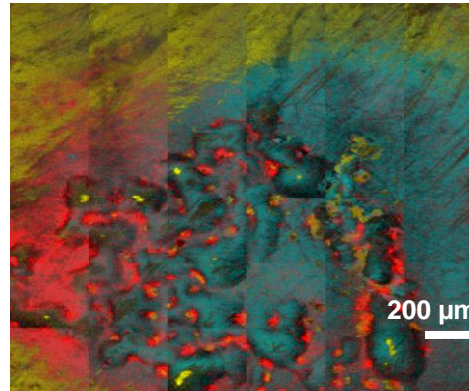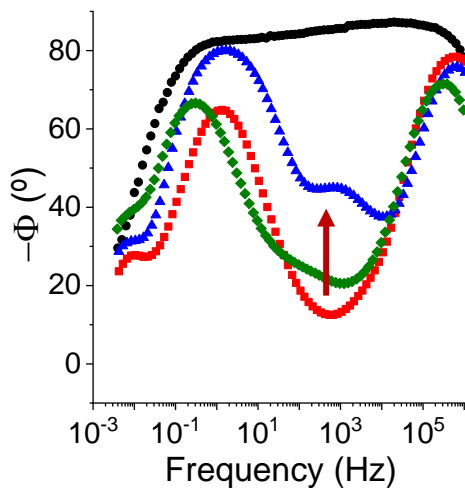

$\text{Cu}^+$

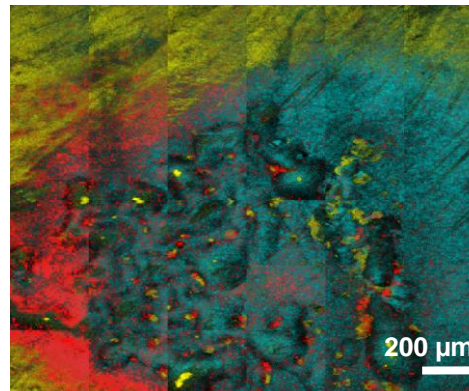

- Self-healing effect: formation of insoluble oxides/hydroxides
- $\text{CeO}^+$  is formed preferentially in  $\text{Cu}^+$  (intermetallic of AA7075)

# Active protection – accelerated corrosion tests / EIS

- Ce0 and Ce(III): decrease / similar  $|Z|$  after 7 days, respectively
- Ce(IV): recovery of  $|Z|$  → inhibitory effect

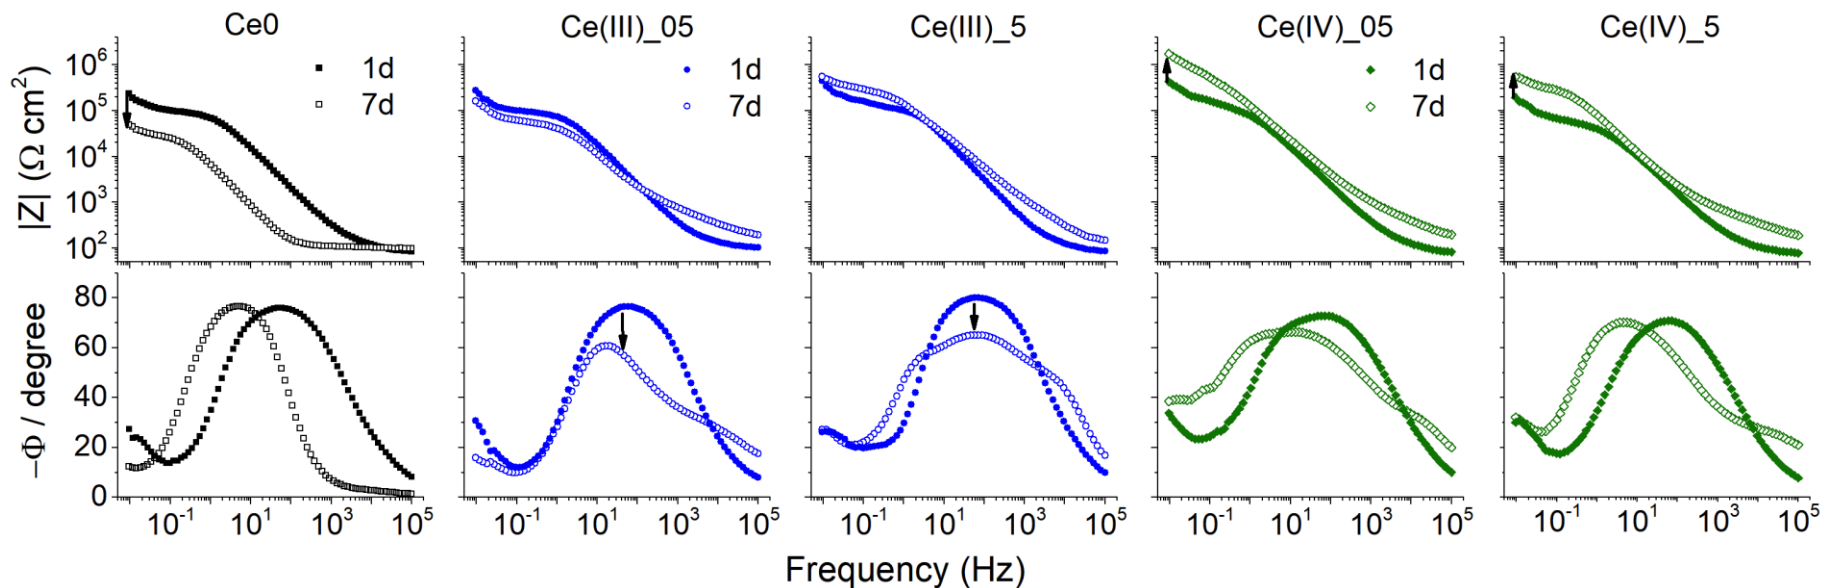



# Active protection – SEM / EDS

- Ce0: Al products → main composition of the scratch
- Ce(III) and Ce(IV): correlation with Cu at the scratch edges

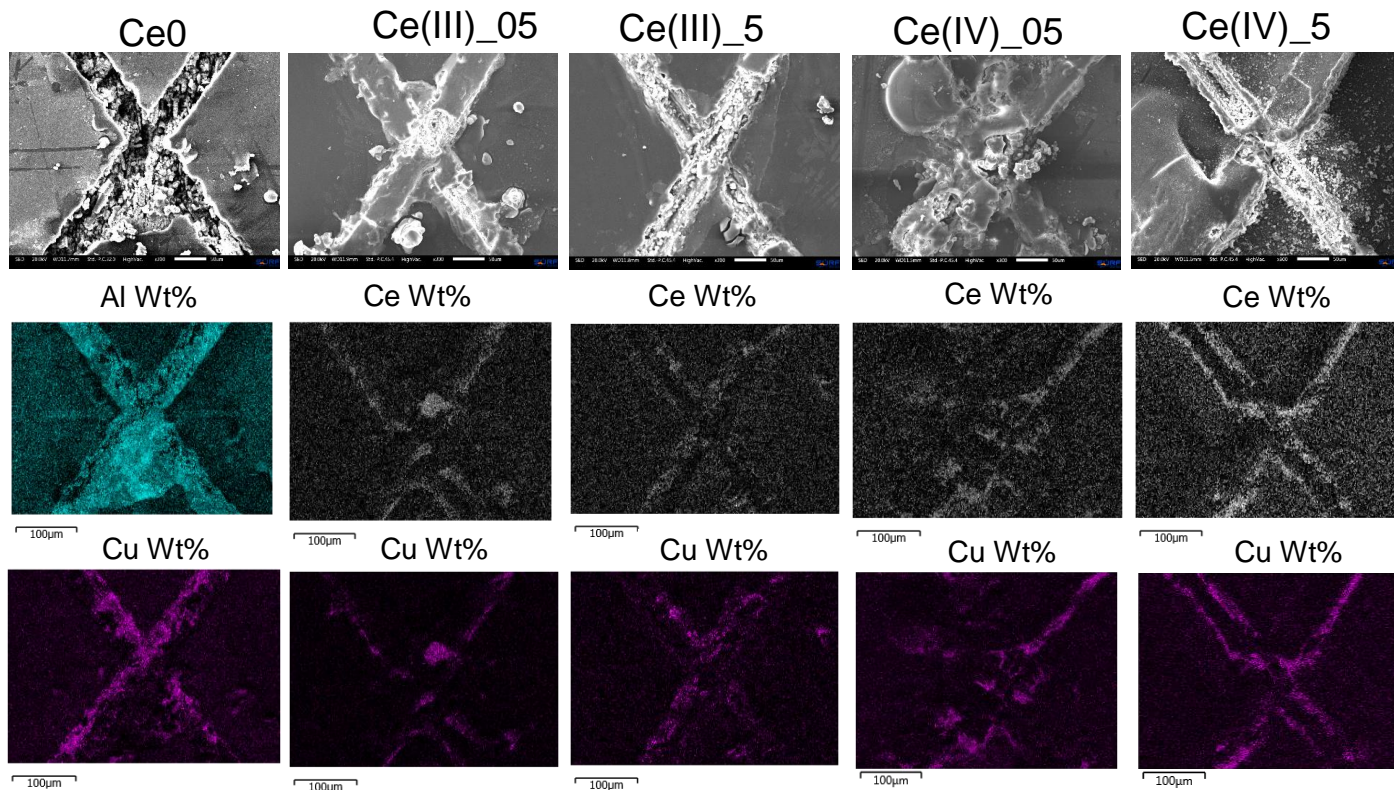

# Active protection – SIMS

Ce(IV)\_5

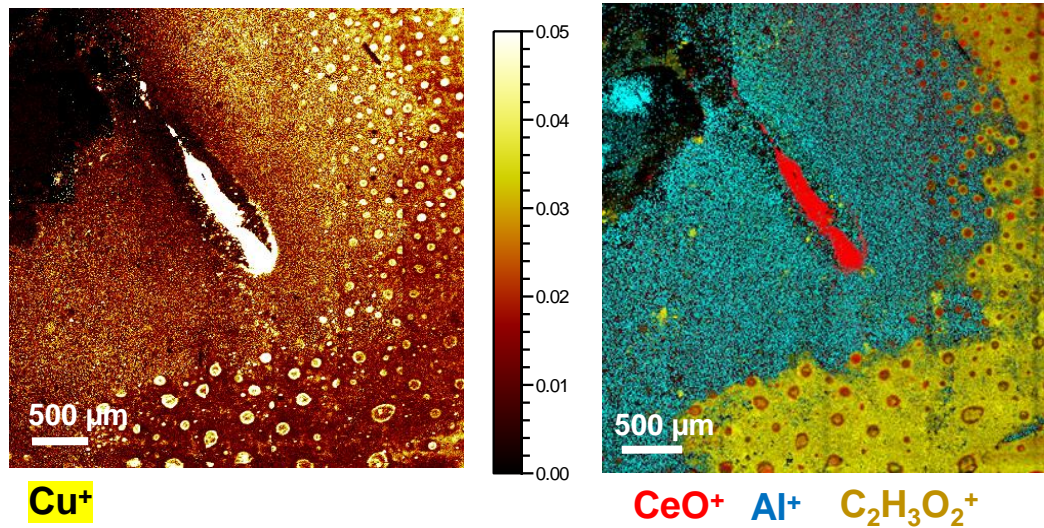

- Higher activity on intermetallic particles
- Correlation of  $\text{CeO}^+$  and  $\text{Cu}^+$  at the scratch track
- Leached Ce(IV) ions from adjacent walls formed a protective layer

# Nanostructural analysis of silica and cerium nanoparticles – TEM

- CeO and Ce(IV)\_05: homogeneous distribution
- Ce(IV)\_3 and Ce(IV)\_5: larger cerium oxide/hydroxide particles (30 - 100 nm)

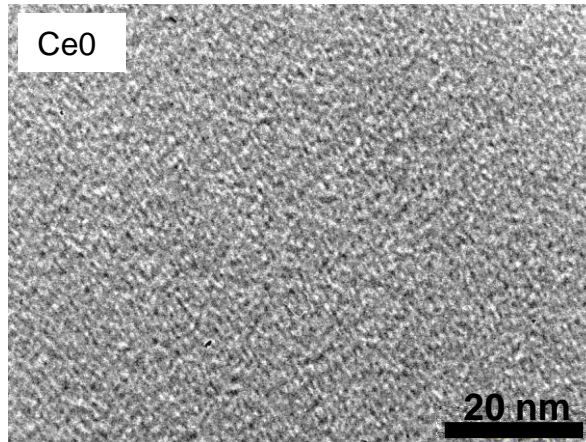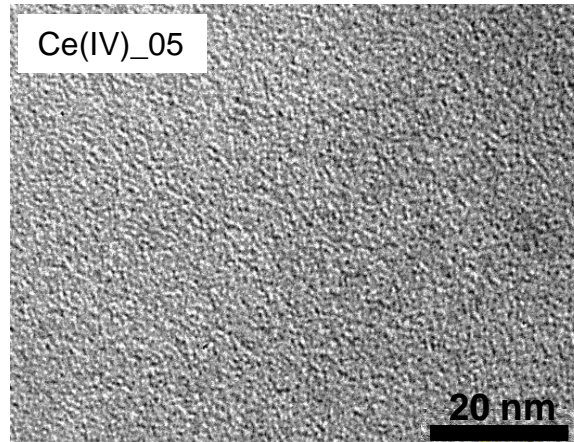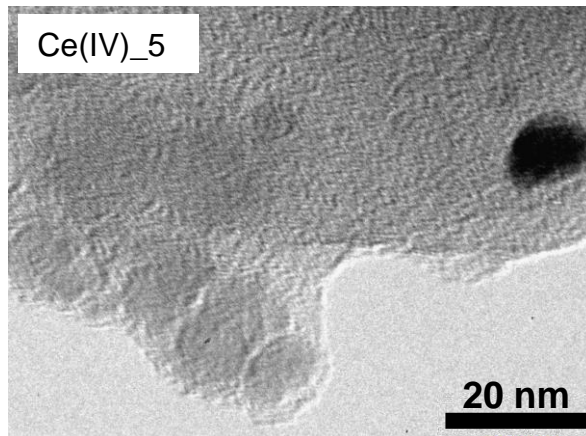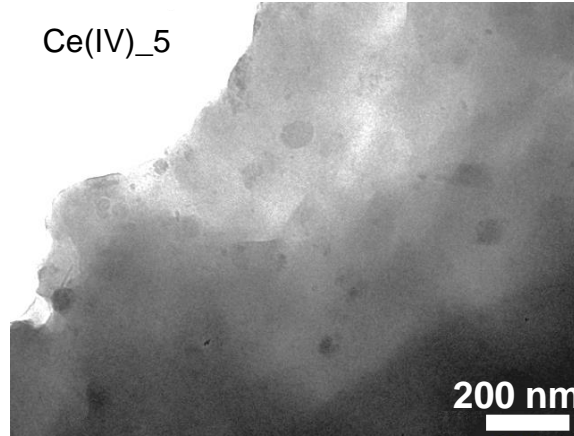

# Surface Chemistry of PMMA-silica-Ce(III)/Ce(IV) – XPS

- **Ce(IV)\_5**: 64% of Ce(IV)
- **Ce(III)\_5**: 41% of Ce(IV)
- Ce(IV) reacts **faster** with OH<sup>-</sup> from oxygen reduction reaction  
→ **insoluble oxides and hydroxides**

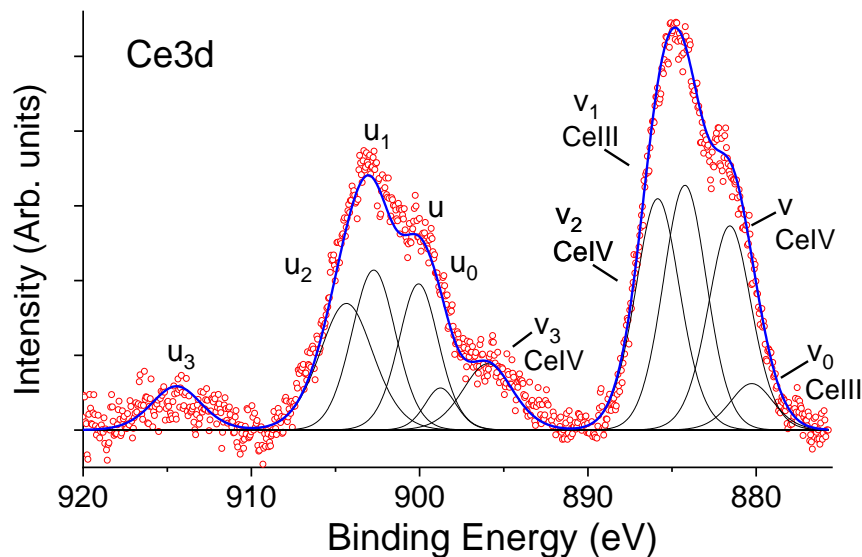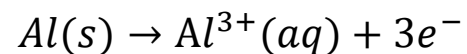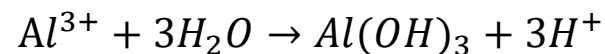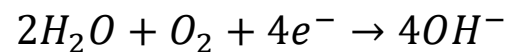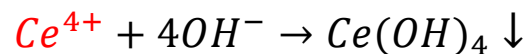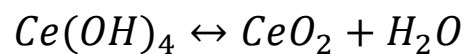

# Current hypothesis

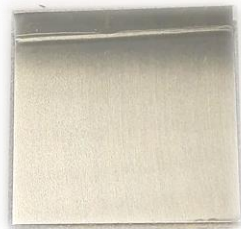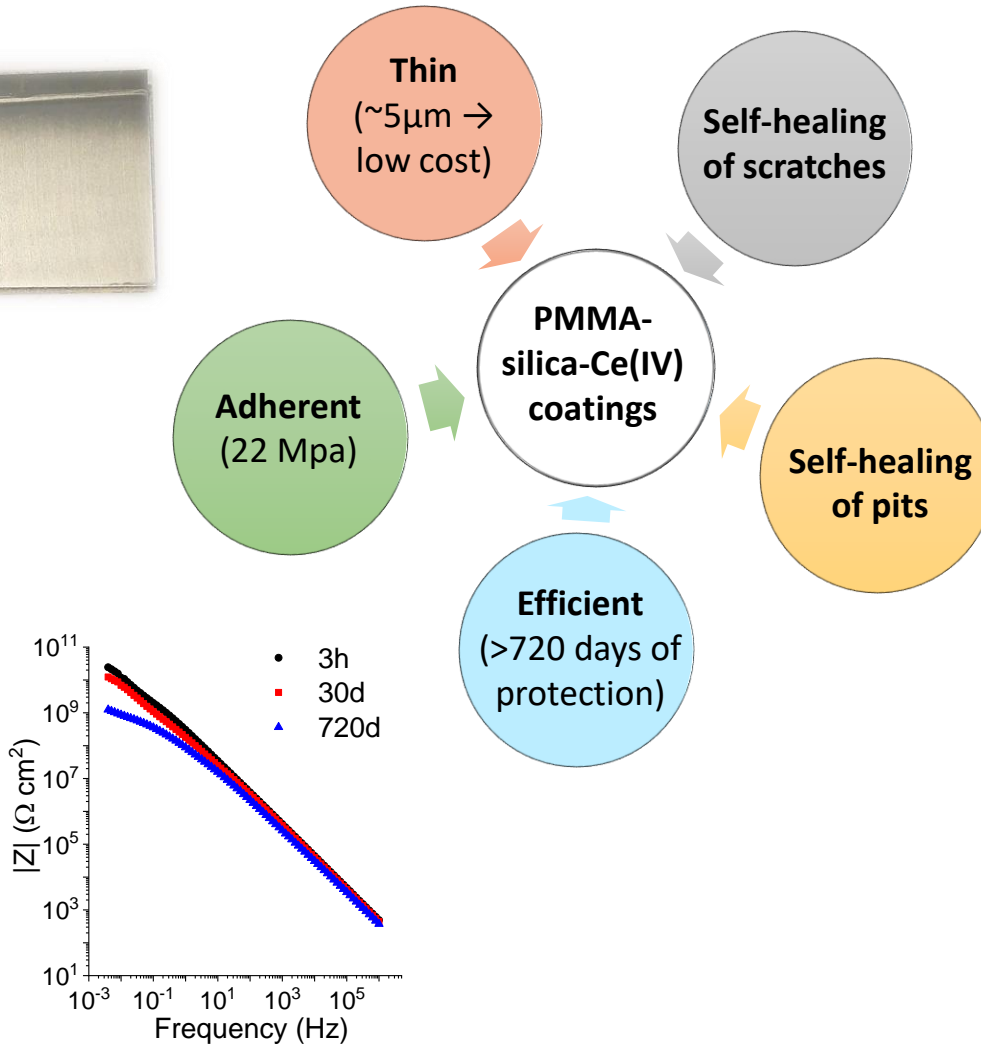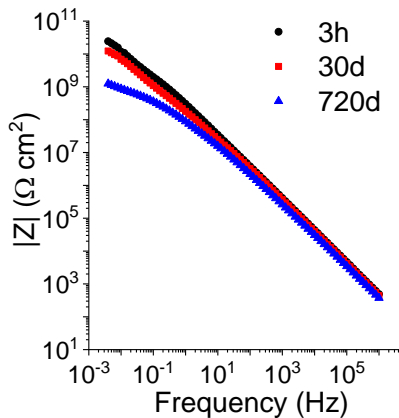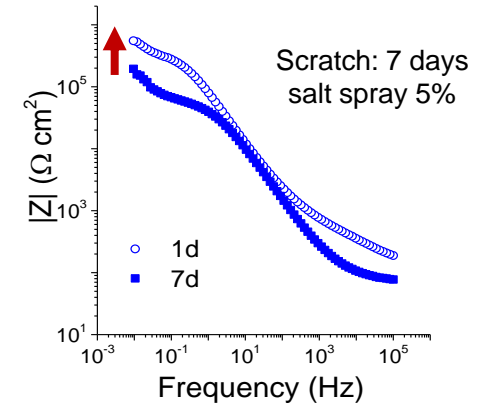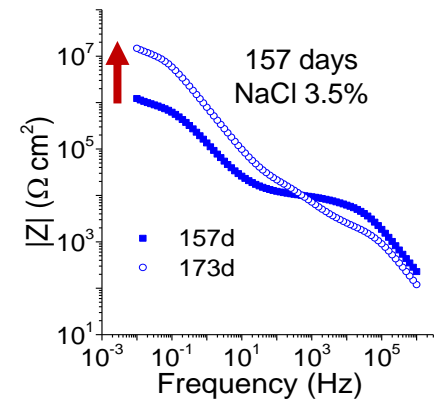

# Thank you

---

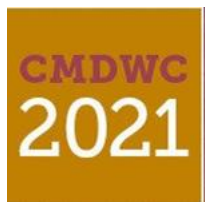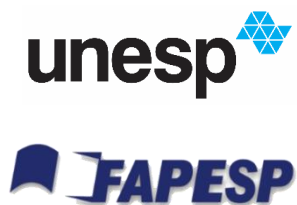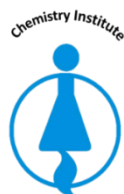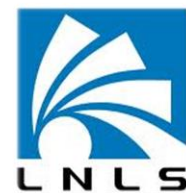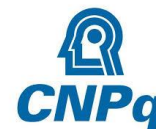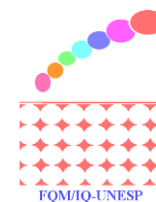

Supplement: s1 [file s1]
